# Supplementary material for: Chronic Covert Brain Infarctions and White Matter Hyperintensities in Patients With Stroke, Transient Ischemic Attack, and Stroke Mimic
Source: PubMed Central journal article supplement — J Am Heart Assoc. 2022 Jan 19;11(3):e024191. doi: 10.1161/JAHA.121.024191 (PMC9238476; doi:10.1161/jaha.121.024191), 2022-01-19
Supplement: JAH3-11-e024191-s001.pdf [file JAH3-11-e024191-s001.pdf]

# **Supplemental Material**

**Table S1. Comparison of event types between patients receiving MRI and CT**

|     | Ischemic stroke | TIA | Mimic | P <0.001 |
|-----|-----------------|-----|-------|----------|
| CT  | 91%             | 8%  | 1.4%  |          |
| MRI | 84%             | 14% | 1.9%  |          |

**Table S2. Baseline characteristics of patients according to final diagnosis**

|                                   | <b>Ischemic stroke</b> | <b>TIA</b>       | <b>Stroke/TIA mimic</b> | <b>p-value</b> |
|-----------------------------------|------------------------|------------------|-------------------------|----------------|
| <b>Clinical Characteristics</b>   | <b>N=1,693</b>         | <b>N=377</b>     | <b>N=42</b>             |                |
| Age, years                        | 71.4 (59.6-80.5)       | 70.3 (59.1-79.4) | 48.65 (37.4-57.5)       | <0.001         |
| Female Sex                        | 689 (40.7%)            | 187 (49.6%)      | 27 (64.3%)              | <0.001         |
| NIHSS admission                   | 3 (1-8)                | 0 (0-1)          | 0 (0-2)                 | <0.001         |
| Living at home before event       | 1,611 (95.5%)          | 359 (95.2%)      | 40 (95.2%)              | 0.97           |
| 1st systolic blood pressure, mmHg | 160 (139-180)          | 157.5 (140-177)  | 138 (126-160)           | <0.001         |
| Hypertension                      | 1,138 (67.3%)          | 233 (61.8%)      | 8 (19.0%)               | <0.001         |
| Diabetes                          | 299 (17.7%)            | 52 (13.8%)       | 2 (4.8%)                | 0.021          |
| Hyperlipidemia                    | 980 (58.0%)            | 152 (40.3%)      | 16 (38.1%)              | <0.001         |
| Smoking                           | 407 (24.5%)            | 76 (20.2%)       | 13 (31.0%)              | 0.11           |
| Atrial Fibrillation               | 363 (21.5%)            | 42 (11.1%)       | 3 (7.1%)                | <0.001         |
| Coronary heart disease            | 259 (15.3%)            | 58 (15.4%)       | 5 (11.9%)               | 0.83           |
| Peripheral artery disease         | 67 (4.0%)              | 22 ( 5.8%)       | 1 (2.4%)                | 0.22           |
| Active cancer                     | 68 (4.0%)              | 10 ( 2.7%)       | 0 (0.0%)                | 0.19           |
| 1st glucose, mmol/L               | 6.4 (5.6-7.7)          | 8.3 (8.3-8.3)    | NA                      | 0.27           |
| 1st creatinine, umol/L            | 80 (67-94)             | 78 (66-92)       | 69 (57-83)              | <0.001         |
|                                   |                        |                  |                         |                |

NIHSS: National Institute of Health Stroke Severity Scale.

**Table S3. Full model for prediction of stroke mimic**

| <b>Variable</b>                                                                    | <b>Odds Ratio</b> | <b>Standard error</b> | <b>Z</b> | <b>P&gt; z</b> | <b>Lower 95% confidence interval</b> | <b>Upper 95% confidence interval</b> |
|------------------------------------------------------------------------------------|-------------------|-----------------------|----------|----------------|--------------------------------------|--------------------------------------|
| Age, years                                                                         | .9546463          | .0125021              | -3.54    | 0.000          | .9304545                             | .979467                              |
| Female sex                                                                         | 3.205605          | 1.146679              | 3.26     | 0.001          | 1.590106                             | 6.462401                             |
| 1 <sup>st</sup> systolic blood pressure after admission, mmHg                      | .9983998          | .0068523              | -0.23    | 0.816          | .9850595                             | 1.011921                             |
| Medical history of arterial hypertension                                           | .2478853          | .1222059              | -2.83    | 0.005          | .0943222                             | .6514599                             |
| Medical history of prior transient ischemic attack                                 | .9408665          | .7083861              | -0.08    | 0.935          | .2151054                             | 4.115329                             |
| Medical history of diabetes mellitus                                               | .5585549          | .4500273              | -0.72    | 0.470          | .1151472                             | 2.709433                             |
| Medical history of atrial fibrillation                                             | .9448546          | .63339                | -0.08    | 0.933          | .2539545                             | 3.515394                             |
| 1st creatinine level after admission, umol/L                                       | 1.010199          | .0031162              | 3.29     | 0.001          | 1.00411                              | 1.016325                             |
| Age related white-matter hyperintensities severity score, ordinal ranging from 0-3 | 1.328679          | .3698693              | 1.02     | 0.307          | .76996                               | 2.292832                             |
| Chronic covert brain infarction                                                    | .2619454          | .1661211              | -2.11    | 0.035          | .0755777                             | .9078784                             |
|                                                                                    |                   |                       |          |                |                                      |                                      |

Full model showing association of CBI (SBIany) with lower probability of a final diagnosis of stroke mimic with adjustment for covariates identified using lasso regression.

Number of observations 2061, Likelihood ratio ( $\chi^2$ ): 80.59,  $P < 0.001$ , Pseudo- $R^2$  0.2042, Log likelihood = -156.99672

**Fig S1. Flow Chart of Patient In/Exclusion**

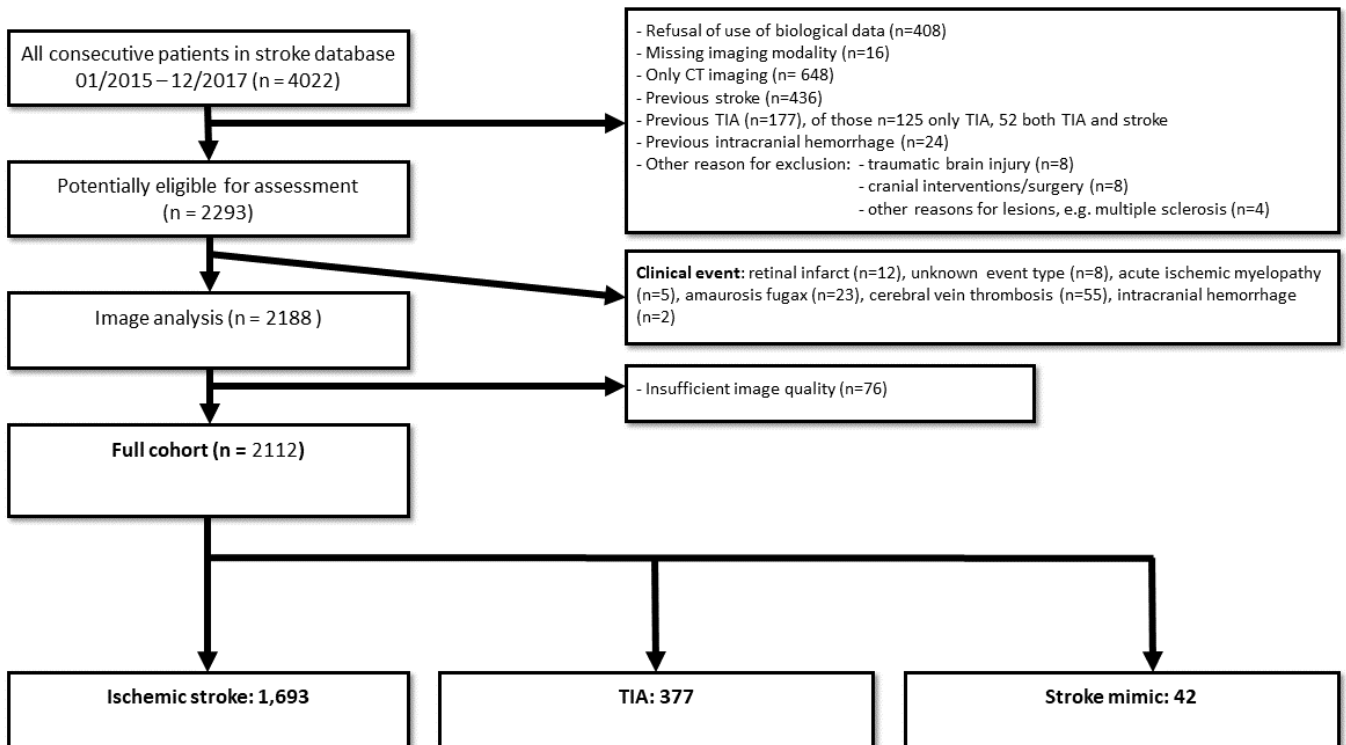

**Figure S2. Examples of phenotypes of covert brain infarction**

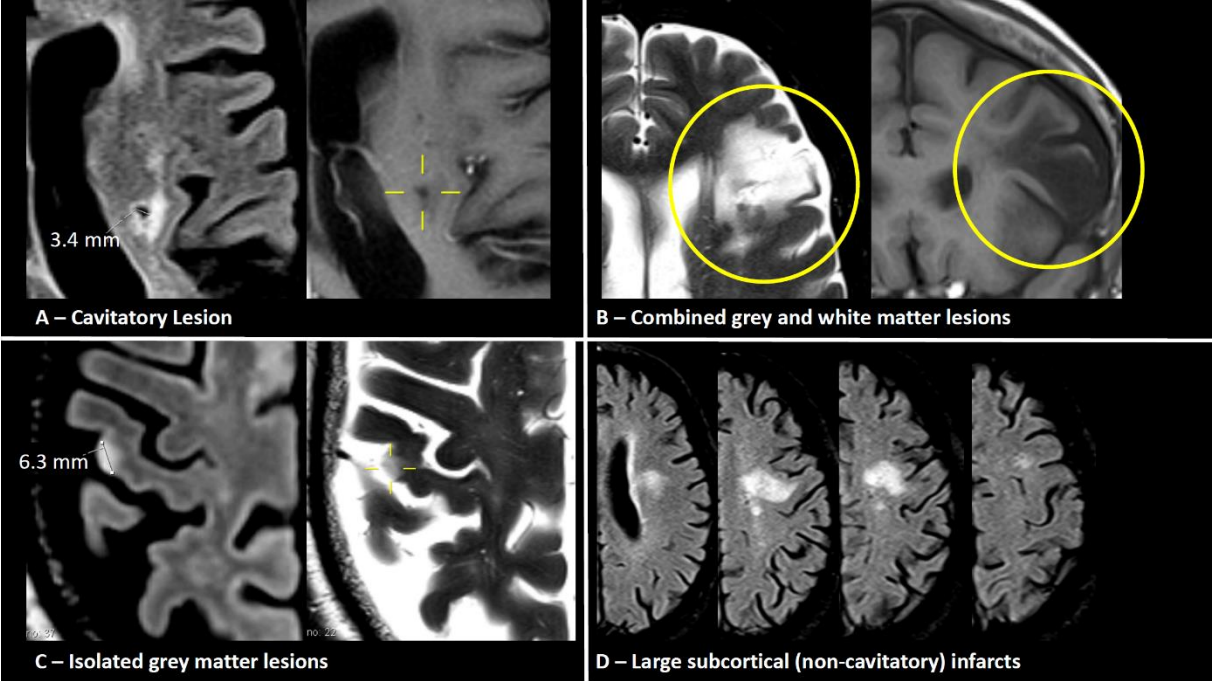

Vynckier et al. 2021, *STROKE* with permission. Copyright ©2014, American Heart Association, Inc.<sup>11</sup>

**Figure S3. Predictive Performance to identify stroke mimics**

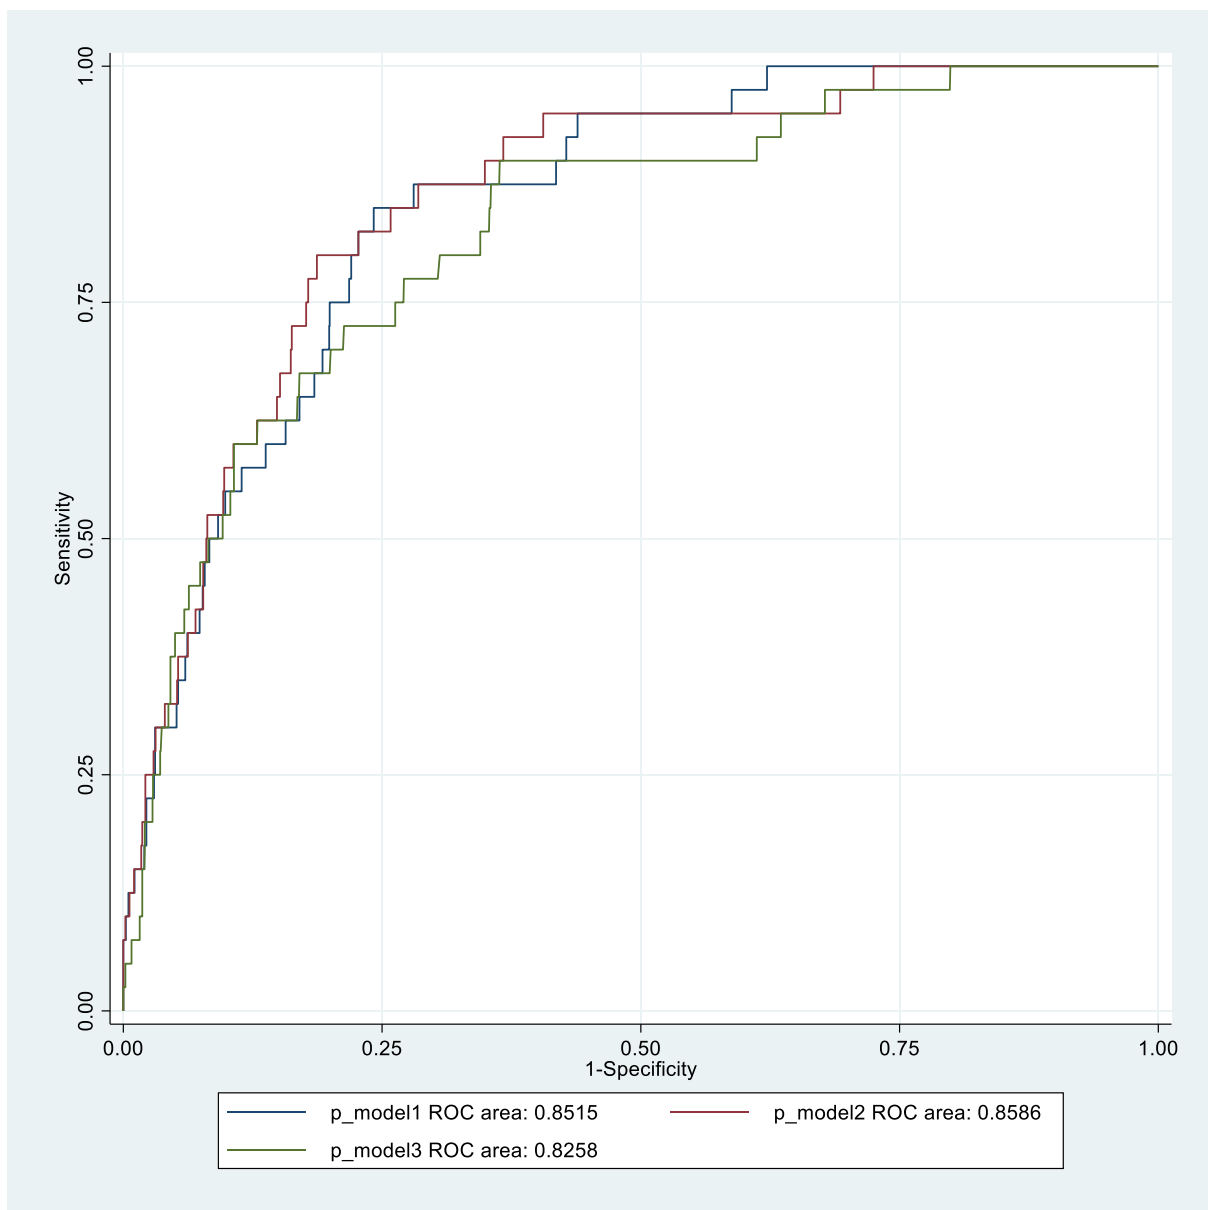

p\_model1 (blue) only clinical variables (Age, sex, systolic blood pressure, history of hypertension, TIA, diabetes, atrial fibrillation and creatinine), model 2 (red) clinical AND neuroimaging (presence of any CBI and WMH severity), model 3 (green) only age, sex and neuroimaging (presence of any CBI and WMH severity)
